# Supplementary material for: 3D Printed Dual‐Porosity Scaffolds: The Combined Effect of Stiffness and Porosity in the Modulation of Macrophage Polarization
Source: PubMed Central journal article supplement — Adv Healthc Mater. 2021 Nov 12;11(1):2101415. doi: 10.1002/adhm.202101415 (PMC11468864; doi:10.1002/adhm.202101415), 2021-11-12
Supplement: ADHM-11-2101415-s001.pdf [file ADHM-11-2101415-s001.pdf]

# ADVANCED HEALTHCARE MATERIALS

## Supporting Information

for *Adv. Healthcare Mater.*, DOI: 10.1002/adhm.202101415

3D printed dual-porosity scaffolds: the combined effect of stiffness and porosity in the modulation of macrophage polarization

*Sandra Camarero-Espinosa, Maria Carlos Oliveira, Hong Liu, João F. Mano, Nicole Bouvy, and Lorenzo Moroni\**

## *Supporting Information*

### **3D printed dual-porosity scaffolds: the combined effect of stiffness and porosity in the modulation of macrophage polarization.**

Sandra Camarero-Espinosa<sup>1,2,3</sup>, Maria Carlos Oliveira<sup>1</sup>, Hong Liu<sup>4</sup>, Joao Mano<sup>5</sup>, Nicole Bouvy<sup>4</sup>, and Lorenzo Moroni<sup>1\*</sup>.

<sup>1</sup>*MERLN Institute for Technology-inspired Regenerative Medicine, Complex Tissue Regeneration Department, Maastricht University, P.O. Box 616, 6200MD Maastricht, The Netherlands*

<sup>2</sup>*POLYMAT, University of the Basque Country UPV/EHU, Avenida Tolosa 72, Donostia / San Sebastián 20018, Gipuzkoa, Spain.*

<sup>3</sup>*IKERBASQUE, Basque Foundation for Science, Bilbao, Spain*

<sup>4</sup>*Department of General Surgery, Maastricht University Medical Center, P.O. Box 616, 6200MD Maastricht, The Netherlands*

<sup>5</sup>*Department of Chemistry, CICECO - Aveiro Institute of Materials, University of Aveiro, 3810-193 Aveiro, Portugal*

\*Corresponding author: [l.moroni@maastrichtuniversity.nl](mailto:l.moroni@maastrichtuniversity.nl)

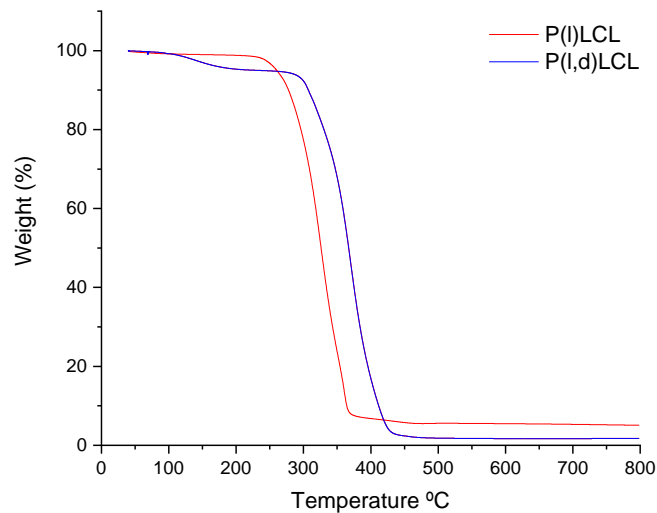

**Supporting Information Figure 1.** Thermogravimetric analysis of P(l)LCL and P(l,d)LCL under nitrogen atmosphere, showing a degradation onset of approximately 300°C and 350° C, respectively.

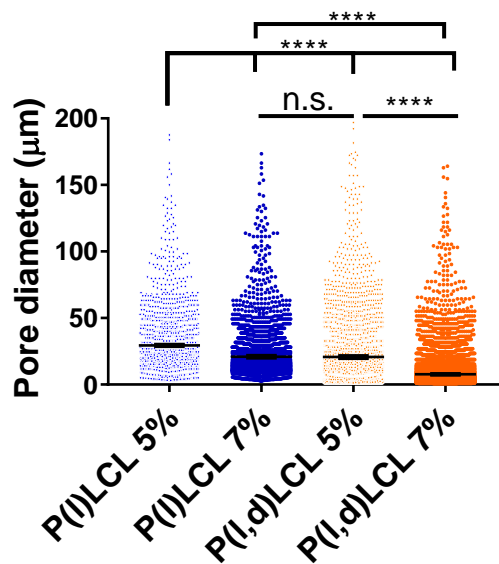

**Supporting Information Figure 2.** Pore diameter on dual porosity scaffolds. Error bars represent mean with 95 % CI. Statistical significance was calculated from one-way ANOVA with Tukey’s multiple comparison test. (\*\*\*\*)  $p < 0.0001$ , (\*\*\*)  $p < 0.001$ , (\*\*)  $p < 0.01$  and (\*)  $p < 0.1$ .

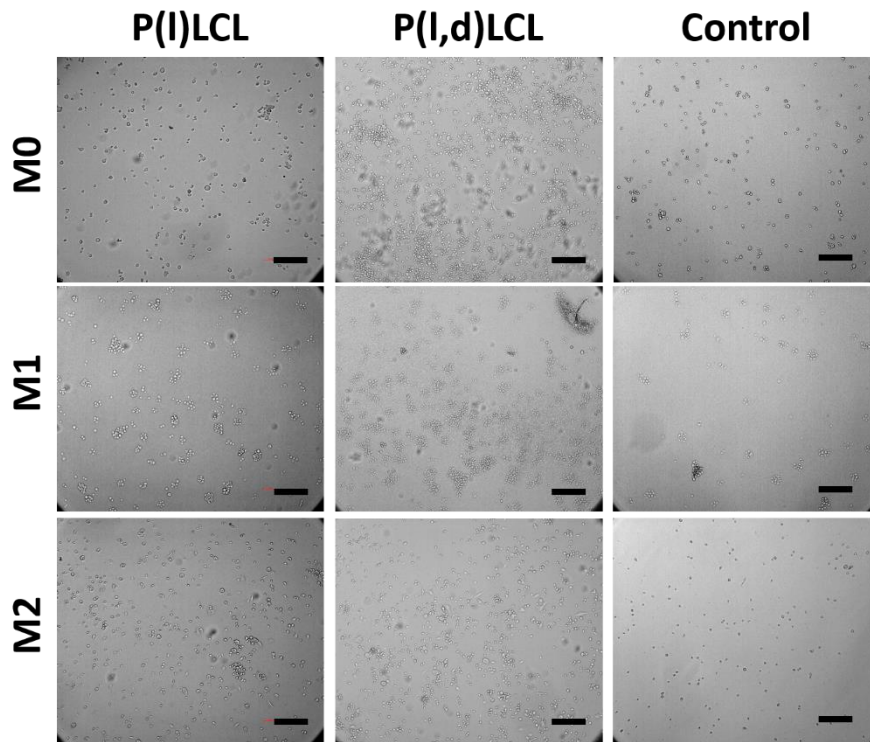

**Supporting Information Figure 3.** Bright field images of macrophages attached to 2D spin coated substrates of P(I)LCL, P(I,d)LCL and TCP control after 48 h of culture. M0 represents the native state of cells when attached to the substrate. M1 (LPS + IFN- $\gamma$ ) and M2 (IL-13 + IL-4) are macrophages after polarization with towards the corresponding phenotypes. Scale bar in all images is 200  $\mu\text{m}$ .

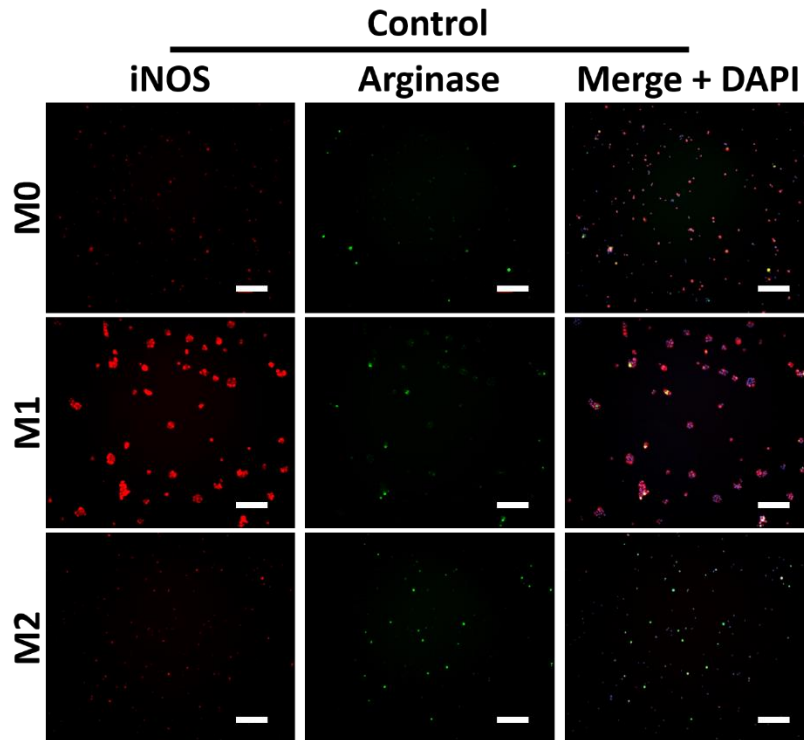

**Supporting Information Figure 4.** Fluorescence microscopy images of macrophages attached to TCP control after 48 h of culture. M0 represents the native state of cells when attached to the substrate. M1 (LPS + IFN- $\gamma$ ) and M2 (IL-13 + IL-4) are macrophages after polarization with towards the corresponding phenotypes. Cells were stained for iNOS (red), arginase (green) and DNA (DAPI, blue) Scale bar in all images is 200  $\mu$ m.

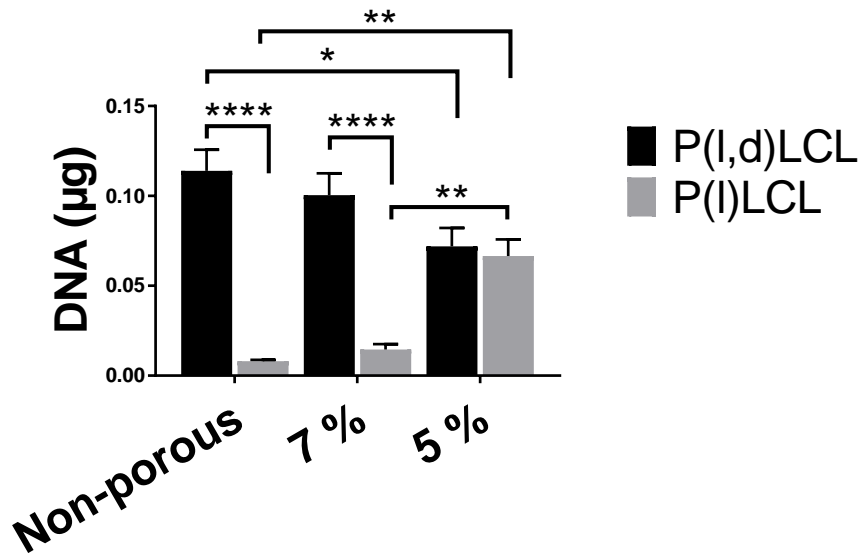

**Supporting Information Figure 5.** Cell attachment to 3D scaffolds. DNA quantification after 48h of culture in non-porous and dual-porosity scaffolds produced from 7% and 5% gels of P(1,d)LCL and P(1)LCL. Statistical significance was calculated from two-way ANOVA with Tukey's multiple comparison test. (\*\*\*\*)  $p < 0.0001$ , (\*\*\*)  $p < 0.001$ , (\*\*)  $p < 0.01$  and (\*)  $p < 0.05$ .

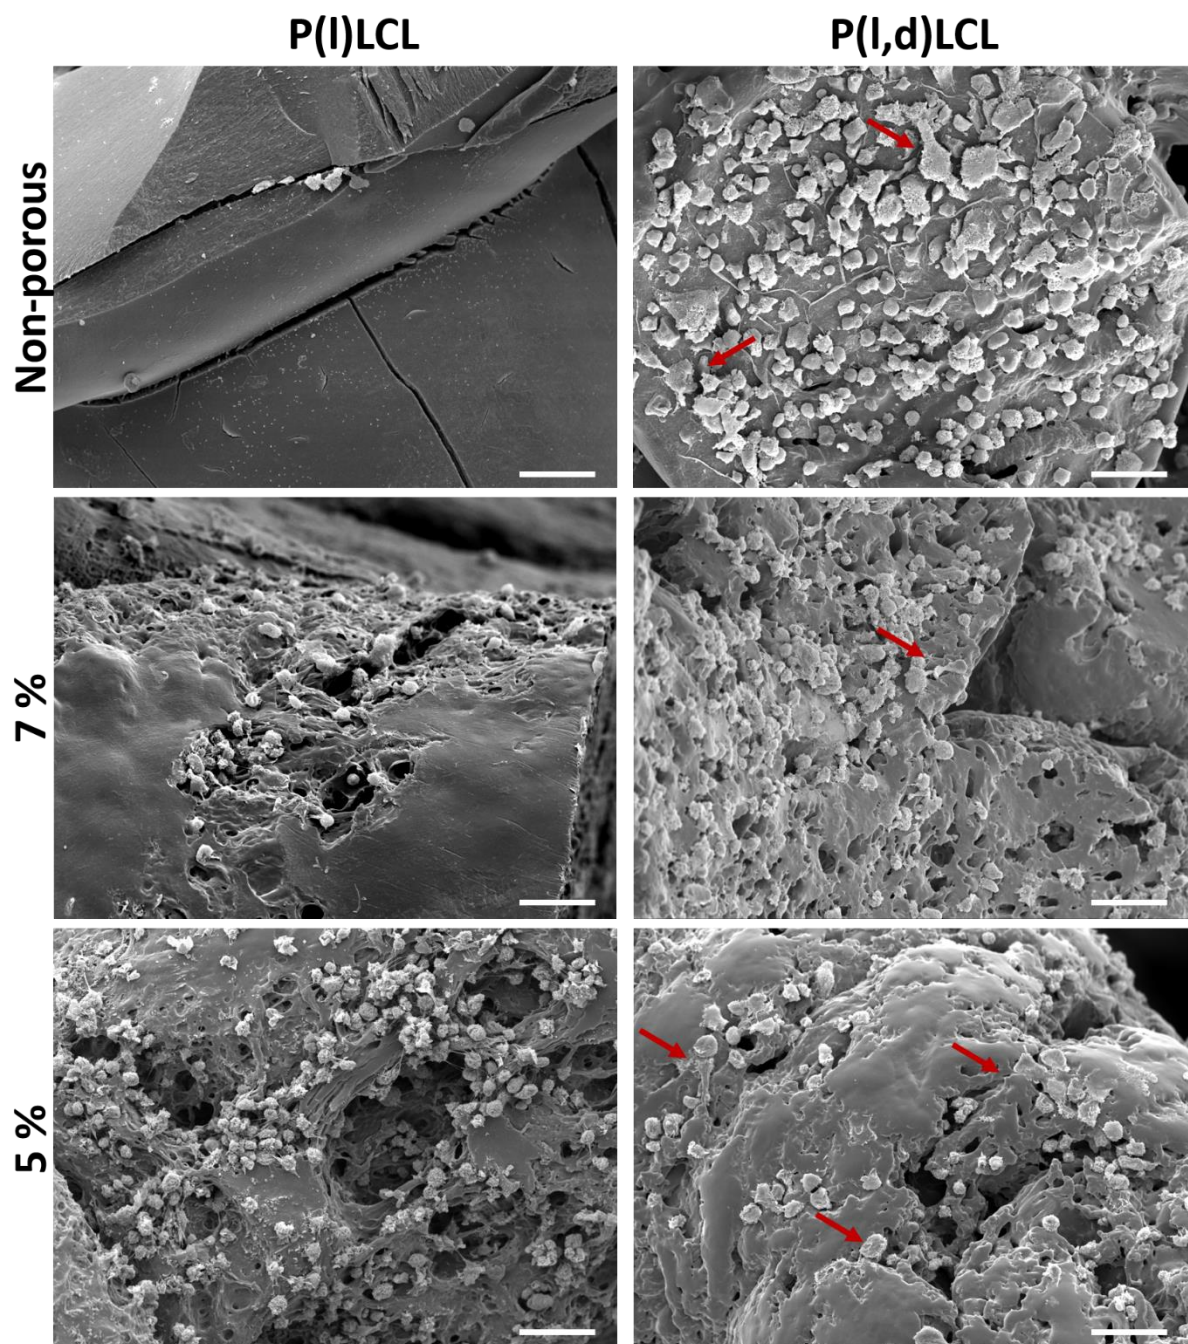

**Supporting Information Figure 6.** Scanning electron microscopy images of macrophages cultured in FDM (non-porous) scaffolds and, 7% and 5% dual-porosity scaffolds fabricated from P(l)LCL or P(l,d)LCL copolymers. Red arrows indicate flattened cells. Scale bar is 50  $\mu\text{m}$ .

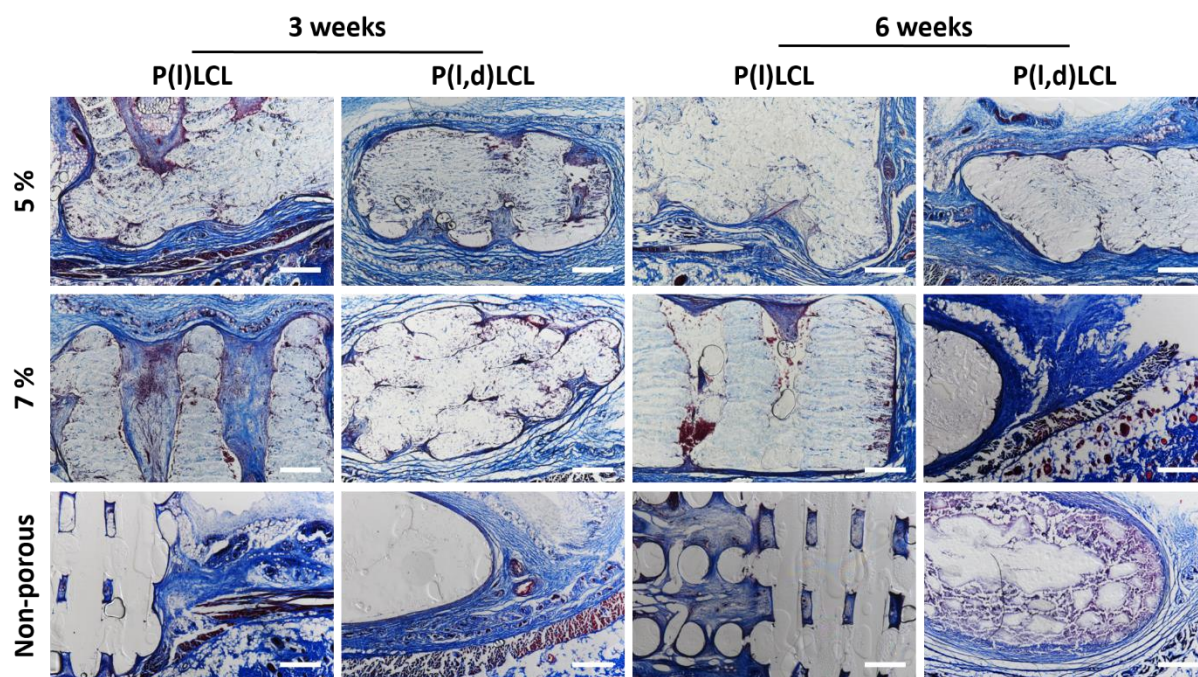

**Supporting Information Figure 7.** Optical microscopy images of non-porous scaffolds and, 7% and 5% dual-porosity scaffolds fabricated from P(I)LCL or P(I,d)LCL copolymers after in-vivo implantation for 3 and 6 weeks. Scale bar is 500  $\mu\text{m}$ .



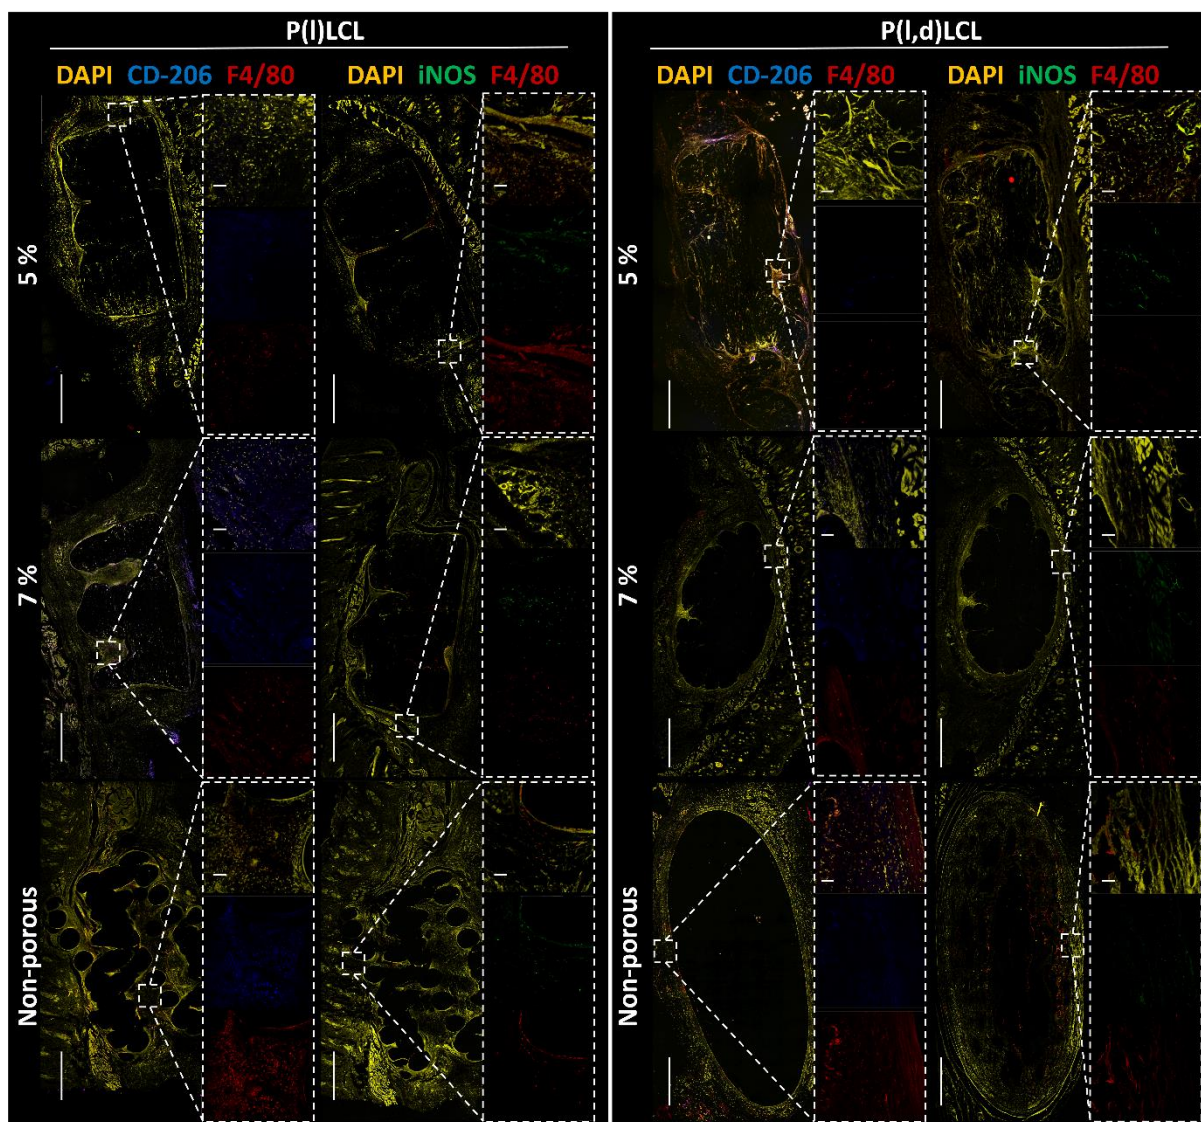

**Supporting Information Figure 8.** Macrophage polarization state after 6 weeks of in-vivo implantation. Immunofluorescence staining of macrophages in the proximity to non-porous and porous P(I)LCL or P(I,d)LCL scaffolds prepared from 7% and 5% polymer gels. Macrophages were stained for F4/80 (red) and mannose receptor (CD-206, blue, M2) or iNOS (green, M1). The entire section was also stained for DAPI (nucleus, yellow) to identify other cells. Scale bar in all images is 1 mm. Dash line boxes indicate areas where a zoom-in was taken. Scale bar in zoom-in images is 30  $\mu$ m.

**Table 1.** Porosity of scaffolds from  $\mu$ CT scans

| <b>Sample</b>       | <b>Porosity (%)</b> | <b>Closed Porosity (%)</b> | <b>Total surface area (mm<sup>2</sup>)</b> | <b>Total pore volume (mm<sup>3</sup>)</b> |
|---------------------|---------------------|----------------------------|--------------------------------------------|-------------------------------------------|
| <b>P(l)LCL 5%</b>   | 61,53               | 0,01                       | 3103                                       | 30,8                                      |
| <b>P(l)LCL 7%</b>   | 69,16               | 0,07                       | 2020                                       | 34,6                                      |
| <b>P(l,d)LCL 5%</b> | 53,33               | 0,01                       | 3543                                       | 26,6                                      |
| <b>P(l,d)LCL 7%</b> | 60,97               | 0,03                       | 2548                                       | 30,5                                      |
